# Supplementary material for: Economic evaluation of endometrial scratching before the second IVF/ICSI treatment: a cost-effectiveness analysis of a randomized controlled trial (SCRaTCH trial)
Source: PubMed Central journal article supplement — Hum Reprod. 2021 Dec 3;37(2):254–63. doi: 10.1093/humrep/deab261 (PMC8804332; doi:10.1093/humrep/deab261), 2021-12-03
Supplement: deab261_supplementary_figure_s1.pdf [file deab261_supplementary_figure_s1.pdf]

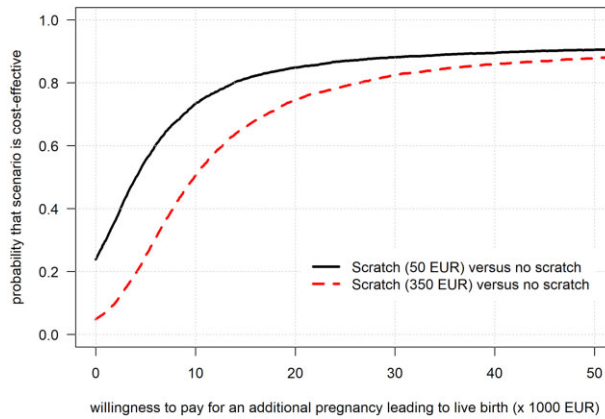

**Supplementary Figure S1. Cost-effectiveness acceptability curve for the chance of pregnancy leading to live birth after 12 months of follow-up using unit prices of €50 and €350 for an endometrial scratch.** The cost-effectiveness acceptability curve is shown for increasing monetary value for each *additional* live birth, with calculations from €1 to €50 000 for two different unit prices for a single endometrial scratch (€50 and €350). Each line indicates the probability that endometrial scratching is cost-effective for a specific scratch unit price at varying monetary values for each additional live birth that resulted from a pregnancy achieved within 12 months after follow-up. EUR, European euro (€).
