# Supplementary material for: Economic evaluation of endometrial scratching before the second IVF/ICSI treatment: a cost-effectiveness analysis of a randomized controlled trial (SCRaTCH trial)
Source: PubMed Central journal article supplement — Hum Reprod. 2021 Dec 3;37(2):254–63. doi: 10.1093/humrep/deab261 (PMC8804332; doi:10.1093/humrep/deab261), 2021-12-03
Supplement: deab261_supplementary_table_s1.pdf [file deab261_supplementary_table_s1.pdf]

**Supplementary Table S1 Unit costs for the intervention, infertility treatments and complications for the United Kingdom (NHS-based).**

| Cost parameter                                                    | Unit costs (£) <sup>a</sup> | Source                                     |
|-------------------------------------------------------------------|-----------------------------|--------------------------------------------|
| Healthcare costs                                                  |                             |                                            |
| Endometrial scratch                                               | 180                         | NHS hospital <sup>e</sup>                  |
| Treatment costs                                                   |                             |                                            |
| IVF/ICSI stimulation only                                         | 850                         | NHS hospital                               |
| IVF/ICSI stimulation and OPU, no lab-phase                        | 2250                        | NHS hospital                               |
| IVF stimulation, OPU, lab-phase, with or without embryo transfer  | 2880                        | NHS hospital                               |
| ICSI stimulation, OPU, lab-phase, with or without embryo transfer | 3330                        | NHS hospital                               |
| Frozen–thaw embryo transfer cycle                                 | 1060                        | NHS hospital                               |
| Medication costs                                                  |                             |                                            |
| FSH analogues (€/IU)                                              | 0.38                        | NICE guideline <sup>f</sup>                |
| GnRH antagonist (€/day)                                           | 27.13                       | NICE guideline                             |
| GnRH agonist (€/day)                                              | 16.50                       | NICE guideline                             |
| Ovulation trigger (€/10 000 IU)                                   | 37.66                       | NICE guideline                             |
| Progesterone (€/200 mg)                                           | 1.00                        | NICE guideline                             |
| Complications                                                     |                             |                                            |
| Mild OHSS <sup>b</sup>                                            | 668.89                      | Estimated based on NHS prices <sup>g</sup> |
| Severe OHSS <sup>c</sup>                                          | 1845.75                     | Estimated based on NHS prices              |

Numbers are presented as British pound sterling (GBP, £).

OHSS, ovarian hyperstimulation syndrome; OPU, oocyte pick-up.

<sup>a</sup>Calculated for the year 2019.

<sup>b</sup>Mild OHSS included clinical symptoms and hospital check-ups but no hospitalization.

<sup>c</sup>Severe OHSS included need for hospitalization.

<sup>e</sup>Source: [University Hospitals Coventry and Warwickshire \(2019\)](#).

<sup>f</sup>Source: [King's Fertility \(2019\)](#).

<sup>g</sup>Source: NHS.
