# Supplementary material for: Economic evaluation of endometrial scratching before the second IVF/ICSI treatment: a cost-effectiveness analysis of a randomized controlled trial (SCRaTCH trial)
Source: PubMed Central journal article supplement — Hum Reprod. 2021 Dec 3;37(2):254–63. doi: 10.1093/humrep/deab261 (PMC8804332; doi:10.1093/humrep/deab261), 2021-12-03
Supplement: deab261_supplementary_table_s2.pdf [file deab261_supplementary_table_s2.pdf]

**Supplementary Table SII** Baseline characteristics of the participants.

|                                                  | Scratch (n = 467) |             | Control (n = 466) |             |
|--------------------------------------------------|-------------------|-------------|-------------------|-------------|
| Female age—yrs                                   | 35.5              | (31.8–39.0) | 35.4              | (31.4–38.7) |
| Female BMI—kg/m <sup>2a</sup>                    | 23.5              | (21.1–26.1) | 24.1              | (21.5–27.3) |
| Duration of infertility—mo                       | 29.0              | (20.0–43.0) | 32.0              | (20.0–45.0) |
| Female smokers <sup>b</sup>                      | 57                | (12.6%)     | 62                | (13.6%)     |
| Type of infertility of the female <sup>c</sup>   |                   |             |                   |             |
| Primary                                          | 263               | (56.3%)     | 257               | (55.2%)     |
| Secondary                                        | 204               | (43.7%)     | 209               | (44.9%)     |
| Cause of infertility                             |                   |             |                   |             |
| Idiopathic                                       | 138               | (29.6%)     | 137               | (29.4%)     |
| Male factor                                      | 225               | (48.2%)     | 213               | (45.7%)     |
| Tubal factor                                     | 21                | (4.5%)      | 23                | (4.9%)      |
| Ovulatory disorder                               | 18                | (3.9%)      | 16                | (3.4%)      |
| Endometriosis grade I/II                         | 5                 | (1.1%)      | 3                 | (0.6%)      |
| Other                                            | 18                | (3.9%)      | 25                | (5.4%)      |
| Mixed diagnosis                                  | 42                | (9.0%)      | 49                | (10.5%)     |
| No. of previous embryo transfers—per participant | 2.3               | (±1.6)      | 2.2               | (±1.5)      |

Data are presented as median (interquartile range), number (%) or mean (±SD).  
mo, months; yrs, years.

This table is a copy of Table I as shown in the original manuscript on the study’s main outcome (van Hoogenhuijze et al., 2020).

<sup>a</sup>Data were missing for two participants in the scratch group and eight participants in the control group.

<sup>b</sup>Data were missing for 13 participants in the scratch group and 10 participants in the control group.

<sup>c</sup>Primary: female has never conceived before. Secondary: female has conceived before.
