# Supplementary material for: Economic evaluation of endometrial scratching before the second IVF/ICSI treatment: a cost-effectiveness analysis of a randomized controlled trial (SCRaTCH trial)
Source: PubMed Central journal article supplement — Hum Reprod. 2021 Dec 3;37(2):254–63. doi: 10.1093/humrep/deab261 (PMC8804332; doi:10.1093/humrep/deab261), 2021-12-03
Supplement: deab261_supplementary_table_s3.pdf [file deab261_supplementary_table_s3.pdf]

**Supplementary Table SIII Descriptives of the second fresh IVF/ICSI treatment.**

|                                                       | Scratch (n = 467) |           | Control (n = 466) |           |
|-------------------------------------------------------|-------------------|-----------|-------------------|-----------|
| Second IVF/ICSI cycle                                 |                   |           |                   |           |
| Starting dose GnRH analogue <sup>a</sup>              | 200               | (125–275) | 225               | (150–300) |
| Type of treatment (fertilization method) <sup>b</sup> |                   |           |                   |           |
| IVF                                                   | 192               | (41.1%)   | 177               | (38.2%)   |
| ICSI                                                  | 260               | (55.7%)   | 268               | (57.5%)   |
| Did not start treatment                               | 15                | (3.2%)    | 21                | (4.3%)    |
| Pituitary downregulation <sup>c</sup>                 |                   |           |                   |           |
| Agonist                                               | 392               | (84.3%)   | 374               | (81.3%)   |
| Antagonist                                            | 59                | (12.7%)   | 68                | (14.8%)   |
| Duration of ovarian stimulation <sup>a</sup>          | 11                | (8–14)    | 11                | (8–14)    |
| Number of oocytes <sup>a</sup>                        | 8                 | (1–15)    | 8                 | (2–14)    |
| Number of embryos frozen <sup>d</sup>                 |                   |           |                   |           |
| 0                                                     | 157               | (33.8%)   | 146               | (31.7%)   |
| 1                                                     | 78                | (16.8%)   | 55                | (12.0%)   |
| 2                                                     | 47                | (10.1%)   | 67                | (14.6%)   |
| 3                                                     | 42                | (9.0%)    | 40                | (8.7%)    |
| 4                                                     | 18                | (3.9%)    | 25                | (5.4%)    |
| 5                                                     | 42                | (9.0%)    | 49                | (10.7%)   |
| 6                                                     | 19                | (4.1%)    | 21                | (4.7%)    |
| 7                                                     | 13                | (2.8%)    | 8                 | (1.7%)    |
| ≥8                                                    | 21                | (4.5%)    | 14                | (3.0%)    |
| Third IVF/ICSI cycle <sup>e</sup>                     |                   |           |                   |           |
| Type of treatment (fertilization method) <sup>f</sup> |                   |           |                   |           |
| IVF                                                   | 58                | (12.4%)   | 58                | (12.4%)   |
| ICSI                                                  | 103               | (22.1%)   | 104               | (22.3%)   |
| Unknown IVF/ICSI                                      | 0                 | (0%)      | 1                 | (0.2%)    |
| Did not start treatment                               | 306               | (65.5%)   | 302               | (64.8%)   |
| Number of oocytes per participant                     | 8                 | (4–10)    | 7                 | (4–11)    |
| Number of embryos frozen                              |                   |           |                   |           |
| 0                                                     | 81                | (17.3%)   | 73                | (15.7%)   |
| 1                                                     | 30                | (6.4%)    | 29                | (6.2%)    |
| 2                                                     | 14                | (3.0%)    | 21                | (4.5%)    |
| 3                                                     | 9                 | (19.3%)   | 15                | (3.2%)    |
| 4                                                     | 12                | (0.9%)    | 10                | (2.1%)    |
| 5                                                     | 6                 | (12.8%)   | 5                 | (1.1%)    |
| 6                                                     | 4                 | (0.9%)    | 5                 | (1.1%)    |
| 7                                                     | 2                 | (0.4%)    | 0                 | (0.0%)    |
| ≥8                                                    | 3                 | (0.6%)    | 4                 | (0.9%)    |

(continued)

Supplementary Table SIII Continued

|                                                                  | Scratch (n = 467) |         | Control (n = 466) |          |
|------------------------------------------------------------------|-------------------|---------|-------------------|----------|
| Fourth IVF/ICSI cycle                                            |                   |         |                   |          |
| Type of treatment (fertilization method) <sup>g</sup>            |                   |         |                   |          |
| IVF                                                              | 8                 | (1.7%)  | 4                 | (0.9%)   |
| ICSI                                                             | 18                | (3.9%)  | 14                | (3.0%)   |
| Unknown IVF/ICSI                                                 | 1                 | (0.2%)  | 0                 | (0.0%)   |
| Did not start treatment                                          | 439               | (94.2%) | 447               | (95.9%)  |
| Number of oocytes                                                | 6                 | (2.5–9) | 8                 | (4–14.5) |
| Number of embryos frozen                                         |                   |         |                   |          |
| 0                                                                | 17                | (3.6%)  | 10                | (2.1%)   |
| 1                                                                | 6                 | (1.3%)  | 4                 | (0.9%)   |
| 2                                                                | 2                 | (0.4%)  | 1                 | (0.2%)   |
| 3                                                                | 1                 | (0.2%)  | 0                 | (0.0%)   |
| 4                                                                | 1                 | (0.2%)  | 1                 | (0.2%)   |
| 5                                                                | 1                 | (0.2%)  | 2                 | (0.4%)   |
| ...                                                              | ...               |         | ...               |          |
| ≥8                                                               | 0                 | (0.0%)  | 1                 | (0.2%)   |
| Fifth IVF/ICSI cycle                                             |                   |         |                   |          |
| ICSI                                                             | 0                 | (0.0%)  | 1                 | (0.2%)   |
| Did not start treatment                                          | 467               | (100%)  | 465               | (99.8%)  |
| Number of oocytes                                                | ...               |         | 3                 | (3–3)    |
| Number of embryos frozen                                         |                   |         |                   |          |
| 0                                                                | ...               |         | 1                 | (0.2%)   |
| Overall: Full follow-up period                                   |                   |         |                   |          |
| Total number of embryo transfers (fresh and frozen) <sup>h</sup> |                   |         |                   |          |
| 0                                                                | 35                |         | 44                |          |
| 1                                                                | 200               |         | 191               |          |
| 2                                                                | 108               |         | 107               |          |
| 3                                                                | 64                |         | 53                |          |
| 4                                                                | 32                |         | 38                |          |
| 5                                                                | 17                |         | 23                |          |
| 6                                                                | 8                 |         | 7                 |          |
| 7                                                                | 2                 |         | 3                 |          |
| 8                                                                | 1                 |         | 0                 |          |
| Total number of embryo transfers performed per group             | 891               |         | 894               |          |

Data are presented as median (IQR) or number (%). NA, not applicable.

<sup>a</sup>Data are missing for n = 42 in the scratch group and n = 66 in the control group.

<sup>b</sup>Data are missing for n = 12 in the scratch group and n = 16 in the control group.

<sup>c</sup>Data are missing for n = 14 in the scratch group and n = 18 in the control group.

<sup>d</sup>Data are missing for n = 40 in the scratch group and n = 62 in the control group.

<sup>e</sup>Data on starting dose GnRH analogue, type of pituitary down regulation and duration of stimulation was not registered for this cycle.

<sup>f</sup>Data are missing for n = 1 in the control group.

<sup>g</sup>Data are missing for n = 1 in the scratch group and n = 1 in the control group.

<sup>h</sup>Data are presented as number of participants that underwent 0, 1, 2, etc. embryo transfers. Per transfer, only one or two embryos were transferred.
