# Supplementary material for: Economic evaluation of endometrial scratching before the second IVF/ICSI treatment: a cost-effectiveness analysis of a randomized controlled trial (SCRaTCH trial)
Source: PubMed Central journal article supplement — Hum Reprod. 2021 Dec 3;37(2):254–63. doi: 10.1093/humrep/deab261 (PMC8804332; doi:10.1093/humrep/deab261), 2021-12-03
Supplement: deab261_supplementary_table_s4.pdf [file deab261_supplementary_table_s4.pdf]

**Supplementary Table SIV** Number of times a resource was ‘used’ for the intervention, infertility treatments and complications.

| Cost parameter                                                     | Scratch (n = 467) | Control (n = 466) |
|--------------------------------------------------------------------|-------------------|-------------------|
| Healthcare costs                                                   |                   |                   |
| Endometrial scratch (n)                                            | 462               | 21                |
| Treatment (n)                                                      |                   |                   |
| IVF/ICSI stimulation only                                          | 48                | 64                |
| IVF/ICSI stimulation and OPU, no lab-phase                         | 4                 | 11                |
| IVF stimulation, OPU, lab-phase, with or without embryo transfer   | 236               | 207               |
| ICSI stimulation, OPU, lab-phase, with or without embryo transfer  | 351               | 345               |
| Frozen–thaw embryo transfer cycle                                  | 355               | 379               |
| Medication costs                                                   |                   |                   |
| FSH analogues                                                      |                   |                   |
| Total number of days                                               | 7029              | 6897              |
| Total IUs used                                                     | 1 352 730         | 1 351 262         |
| GnRH antagonist ( <i>days, standard dose for all patients</i> )    | 586               | 680               |
| GnRH agonist ( <i>days, standard dose for all patients</i> )       | 1 1106            | 10596             |
| Ovulation trigger ( <i>times, standard dose for all patients</i> ) | 591               | 563               |
| Progesterone ( <i>days, standard dose for all patients</i> )       | 9648              | 9252              |
| Complications (n)                                                  |                   |                   |
| Mild OHSS <sup>a</sup>                                             | 17                | 10                |
| Severe OHSS <sup>b</sup>                                           | 3                 | 5                 |
| Pregnancy complications (n)                                        |                   |                   |
| Miscarriage                                                        | 80                | 75                |
| Ectopic pregnancy/PUL                                              | 5                 | 5                 |

Numbers indicate the number of times a resource was used during the full 12 month period.

IU, international unit; mg, milligram; OHSS, ovarian hyperstimulation syndrome; OPU, oocyte pick-up; PUL, pregnancy of unknown location.

<sup>a</sup>Mild OHSS included clinical symptoms, sick leave and hospital check-ups but no hospitalization.

<sup>b</sup>Severe OHSS included need for hospitalization.
